# Supplementary material
Source: PubMed Central journal article supplement (PMC10863980)
Supplement: NIHMS1962283-supplement-2.pdf [file NIHMS1962283-supplement-2.pdf]

## 1 Extended Data

### 2 Supplementary Text

#### 3 Alterations in cell subtype abundance and gene expression are only partially 4 associated with prior DENV exposure

5 To determine whether the alterations we detected in cell subtype abundance and gene  
6 expression in SD progressors are associated with prior exposure to DENV, we analyzed cell  
7 subtype fractions and DEGs in primary vs. secondary DENV-infected patients across  
8 disease outcomes (**Supplementary Table 1**). Activated B cells and exhausted CD8+ T cell  
9 fractions were expanded in secondary relative to primary dengue patients regardless of  
10 disease outcome, suggesting association with prior DENV exposure but not disease severity  
11 (**Extended Data Fig. 2c**). In contrast, memory B cell and Treg fractions were expanded only  
12 in SDp with secondary infection, confirming that some alterations are unique to secondary  
13 SDp. The expansion of proliferating plasmablasts and memory CD4+ T cell fractions was  
14 comparable in primary and secondary SDp relative to uncomplicated dengue (D/DWS), thus  
15 more likely associated with disease progression rather than prior exposure to DENV. Lastly,  
16 reduction of non-classical monocyte and cytotoxic NK cell fractions was observed in all  
17 patient categories except for primary uncomplicated dengue (D/DWS), suggesting  
18 association with both prior exposure and progression.

19 Next, we compared the expression of DEGs we identified between SD progressors and D  
20 patients in APCs (**Fig. 2a-c**) and effector cells (**Fig. 3a-c**) in primary vs. secondary dengue  
21 infection in D and SDp patients. Several interesting observations were made; however,  
22 these require further validation given the small number of patients for each disease category:  
23 primary (total n=4: D (n=2), SDp (n=2)); secondary (total n=10: D (n=5), and SDp (n=5)).

24 Genes involved in antigen uptake (*CD163*, *FCGR1A* and *FCGR1B*) were mildly upregulated  
25 in secondary dengue infections in APCs (**Extended Data Fig. 4a**), and *IgG* genes and  
26 genes involved in antibody secretion were upregulated in secondary dengue infections in  
27 plasmablasts (**Extended Data Fig. 5f**). Since similar patterns were observed for these  
28 genes in SDp vs. D (**Fig. 2a and Fig. 3f**), these findings highlight association of signatures  
29 linked with ADE with prior DENV exposure, as previously reported<sup>7,8</sup>.

30 In contrast, MHC-II genes were upregulated in secondary vs. primary infection in APCs  
31 (**Extended Data Fig. 4a**), suggesting that their downregulation in SDp vs. D (**Fig. 2a-c**) is  
32 not associated with prior exposure to DENV, but rather with disease progression. Variable  
33 patterns were observed upon comparison of IFN response genes and genes involved in  
34 inflammation, migration and adhesion between secondary vs. primary infections (**Extended**  
35 **Data Fig. 4a**) and SDp vs. D (**Fig. 2a-c**), suggesting that these APCs' responses are only

36 partially associated with DENV exposure. Similarly, whereas genes associated with  
37 exhaustion were upregulated in T and NK cells in secondary vs. primary infections as in SDp  
38 vs. D, variable expression patterns were observed for genes involved in cell activation (e.g.  
39 *IL32* in T cells and *KLRB1* in NK cells) and IFN response (e.g. *IFIT3* in T cells), suggesting  
40 only partial association of altered responses observed in these effector cells in SDp with  
41 prior DENV exposure (**Extended Data Fig. 5f, Fig. 3a-c**).

42 This analysis is subject to a substantial limitation due to the relatively modest number of  
43 patients in each category. Because of the small n, it is not possible to perform robust  
44 statistical analyses after subdividing the patients by both outcome and previous exposure  
45 simultaneously. As a consequence, we only stratify patients by either outcome (in the main  
46 text) or prior exposure (here). Because prior exposure is itself associated with severe  
47 outcome, this simpler stratification is not as clean as an ideal experimental design would  
48 warrant. In future studies with a larger sample size, for which sample collection is ongoing,  
49 we plan to perform a double subdivision based on both criteria simultaneously in order to  
50 obtain more definitive answers.

51 Taken together, these findings support that prior DENV exposure is associated with  
52 pathways involved in ADE, as previously reported, and possibly with effector cell exhaustion.  
53 Importantly, these findings reveal that other hallmarks of SD progression, such as  
54 downregulation of MHC-II genes, may be only partially or not associated with DENV  
55 exposure. Yet, these findings require validation in larger cohorts given the limited number of  
56 samples.

57
